# Supplementary material for: A Comparison of Two Classes of Methods for Estimating False Discovery Rates in Microarray Studies
Source: PubMed Central journal article supplement (PMC3820438; doi:10.6064/2012/519394), 2012-07-08
Supplement: 519394.f1.pdf [file 519394.f1.pdf]

## APPENDIX A: RESULTS FOR EV SIMULATIONS

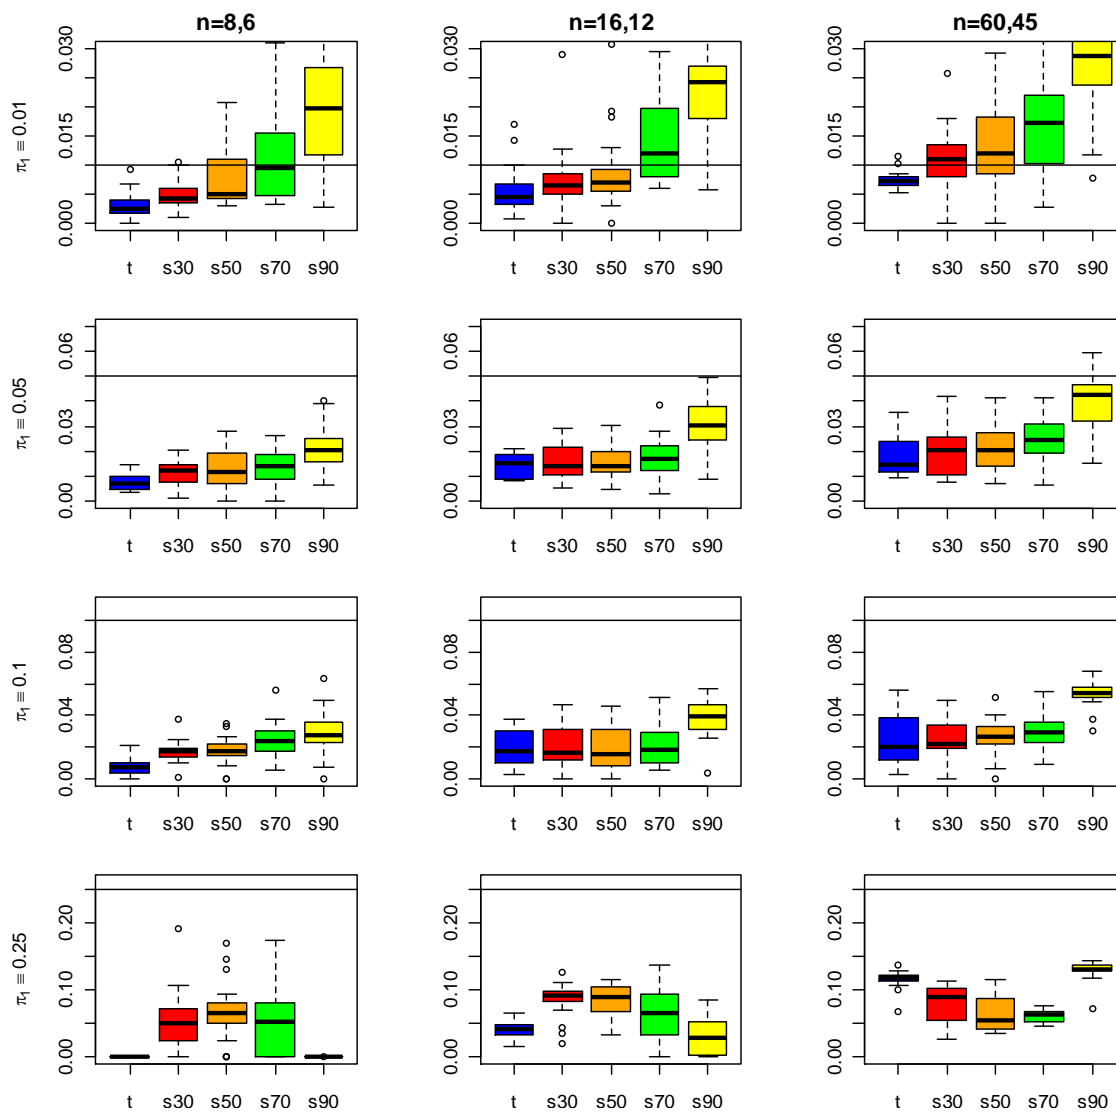

**Figure 7.** 'fdrtool' estimates of  $\pi_1$  for the t-statistic and four s-statistics in a type EV simulation with the IQR rescaling factor and t-statistic input specification. A reference line is drawn at  $\pi_1$ , the true proportion of differentially expressed genes.

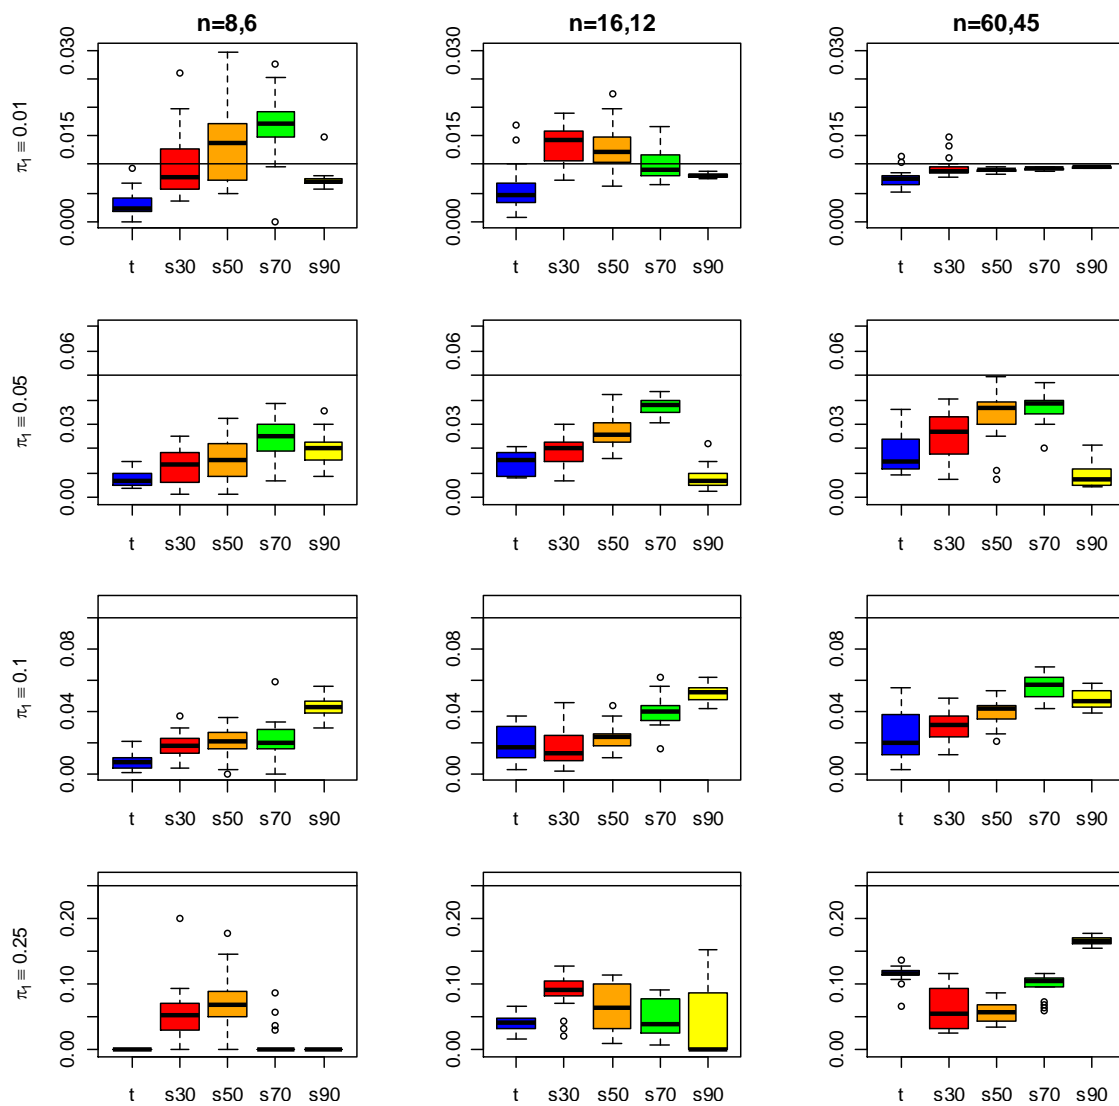

**Figure 8.** 'fdrtool' estimates of  $\pi_1$  for the t-statistic and four s-statistics in a type EV simulation with the SD rescaling factor and t-statistic input specification. A reference line is drawn at  $\pi_1$ , the true proportion of differentially expressed genes.

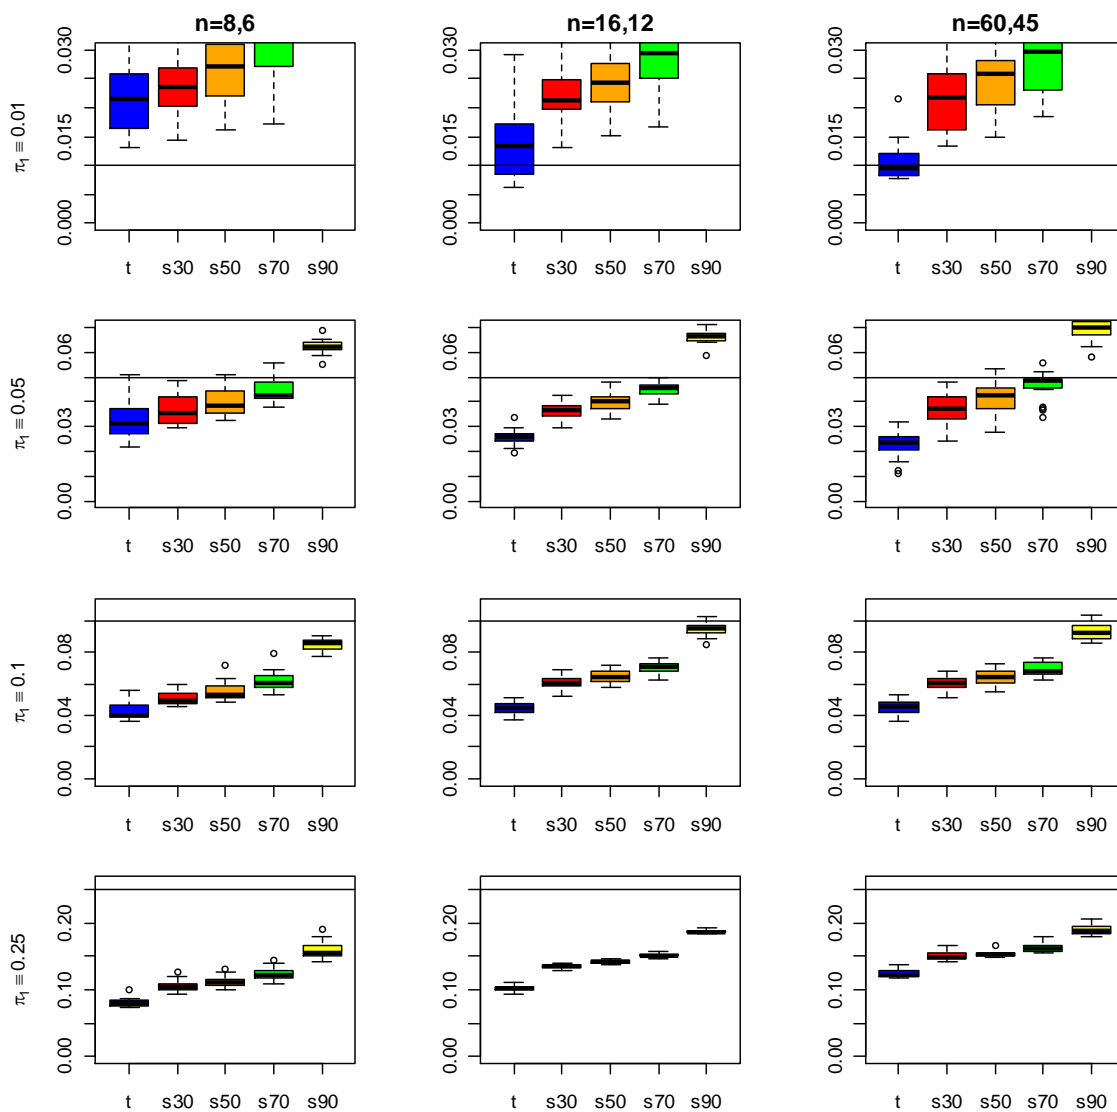

**Figure 9.** ‘fdrtool’ estimates of  $\pi_1$  for the t-statistic and four s-statistics in a type EV simulation with the IQR rescaling factor and z-statistic input specification. A reference line is drawn at  $\pi_1$ , the true proportion of differentially expressed genes.

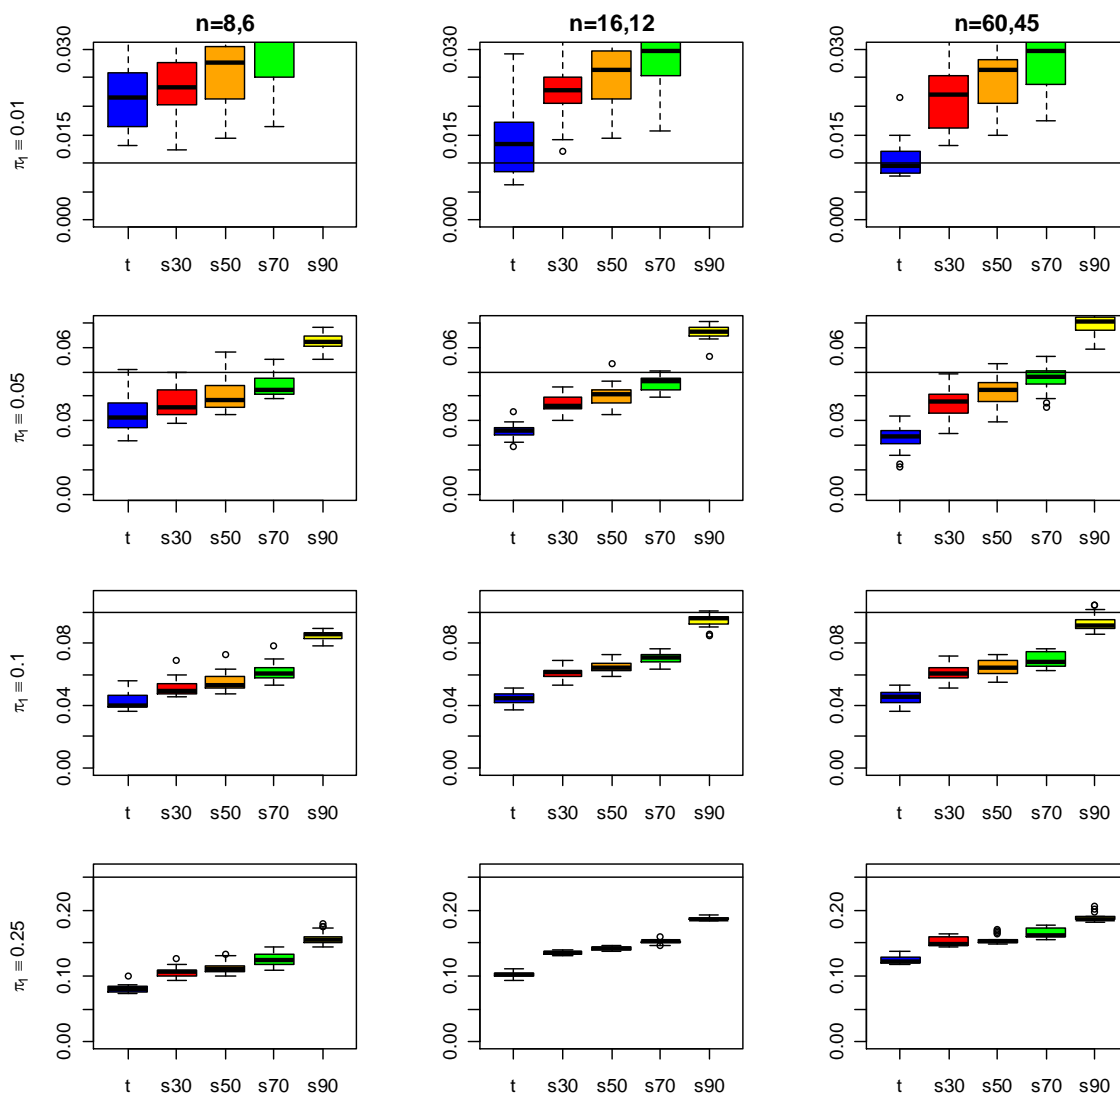

**Figure 10.** 'fdrtool' estimates of  $\pi_1$  for the t-statistic and four s-statistics in a type EV simulation with the SD rescaling factor and z-statistic input specification. A reference line is drawn at  $\pi_1$ , the true proportion of differentially expressed genes.

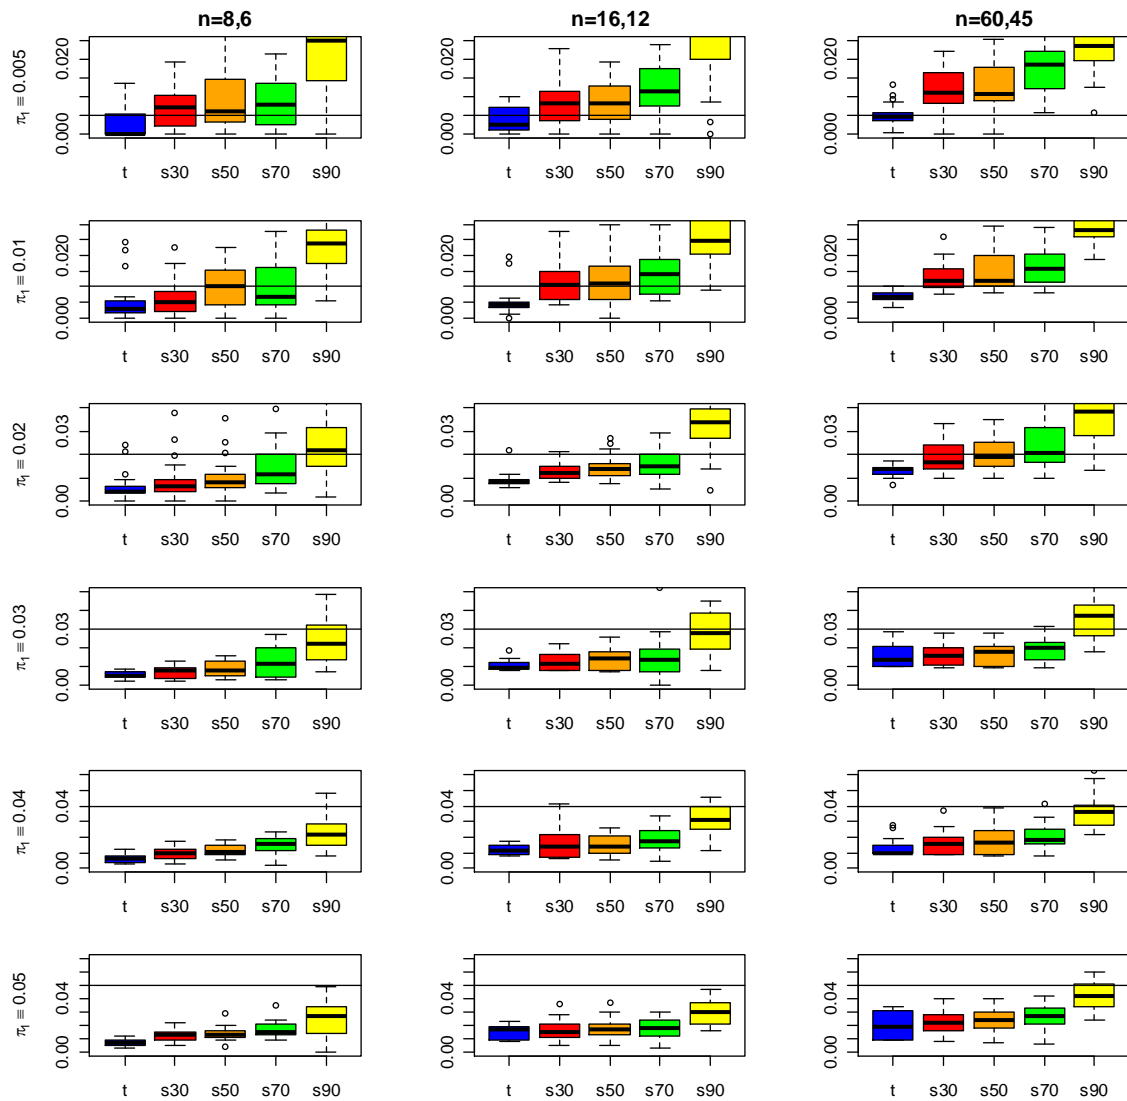

**Figure 11.** 'fdrtool' estimates of  $\pi_1$  for the t-statistic and four s-statistics in a type EV simulation with the IQR rescaling factor and t-statistic input specification. A reference line is drawn at  $\pi_1$ , the true proportion of differentially expressed genes.

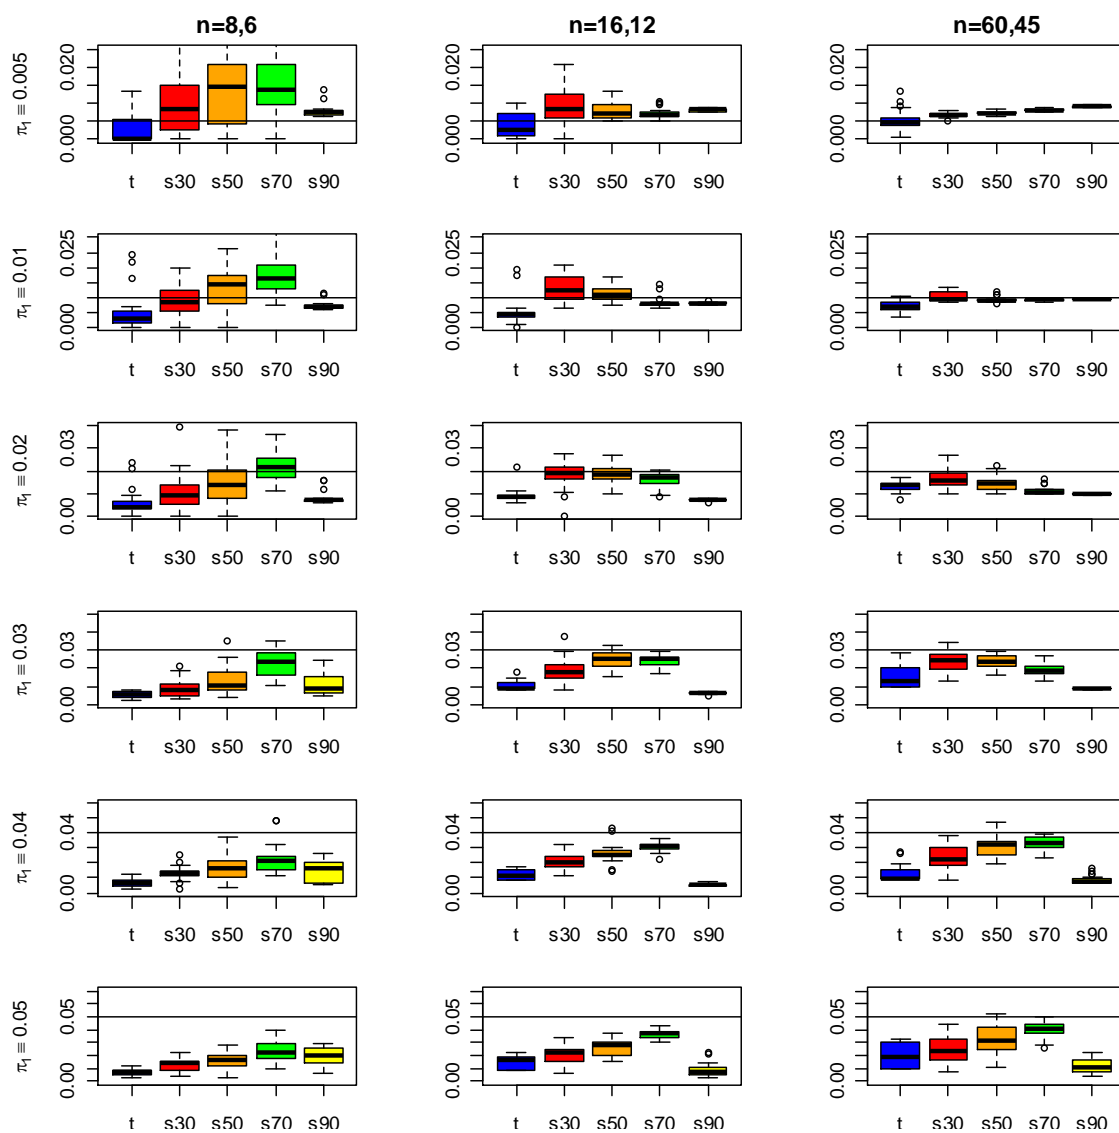

**Figure 12.** 'fdrtool' estimates of  $\pi_1$  for the t-statistic and four s-statistics in a type EV simulation with the SD rescaling factor and t-statistic input specification. A reference line is drawn at  $\pi_1$ , the true proportion of differentially expressed genes.

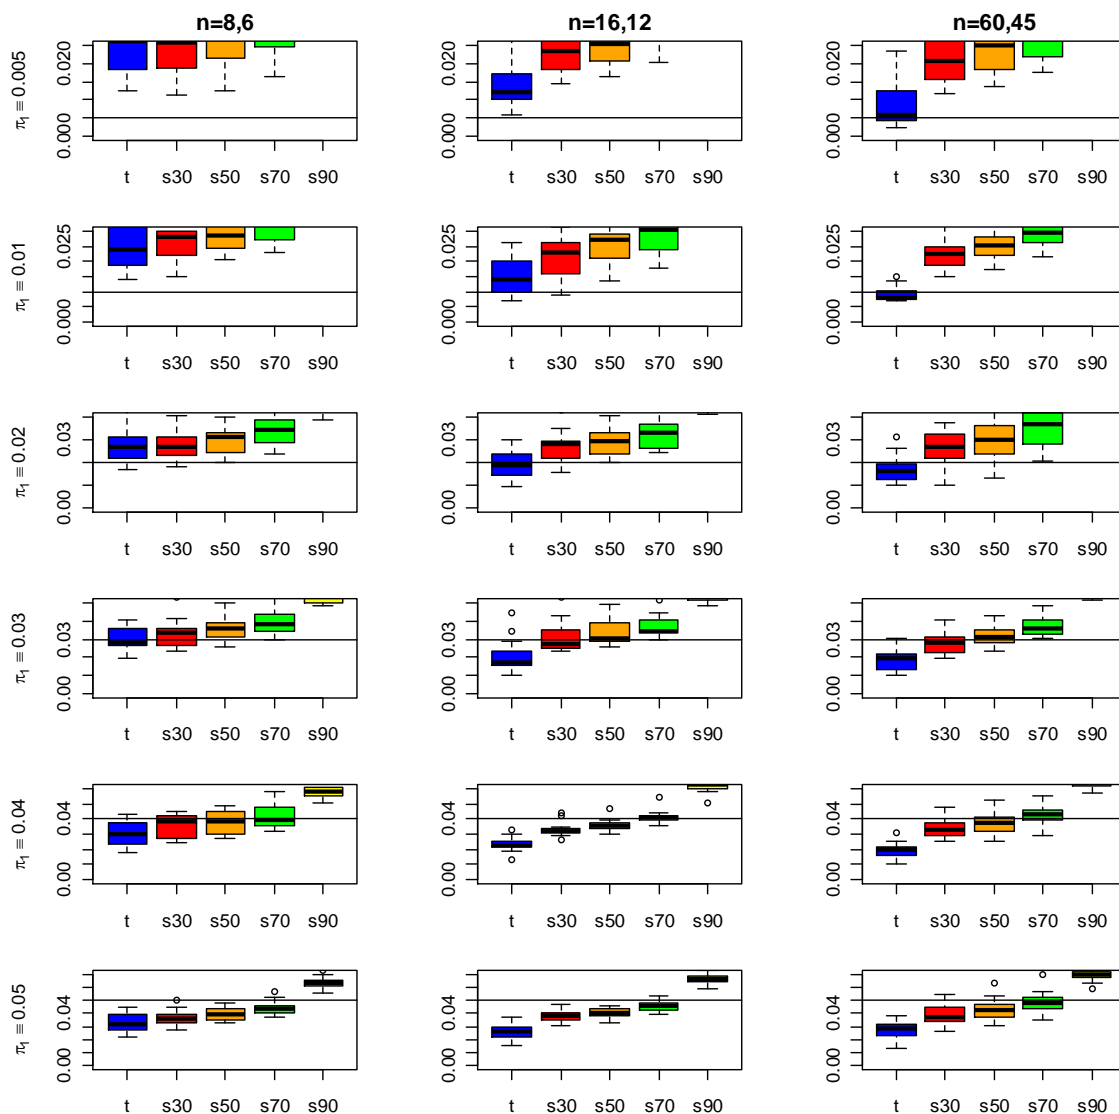

**Figure 13.** 'fdrtool' estimates of  $\pi_1$  for the t-statistic and four s-statistics in a type EV simulation with the IQR rescaling factor and z-statistic input specification. A reference line is drawn at  $\pi_1$ , the true proportion of differentially expressed genes.

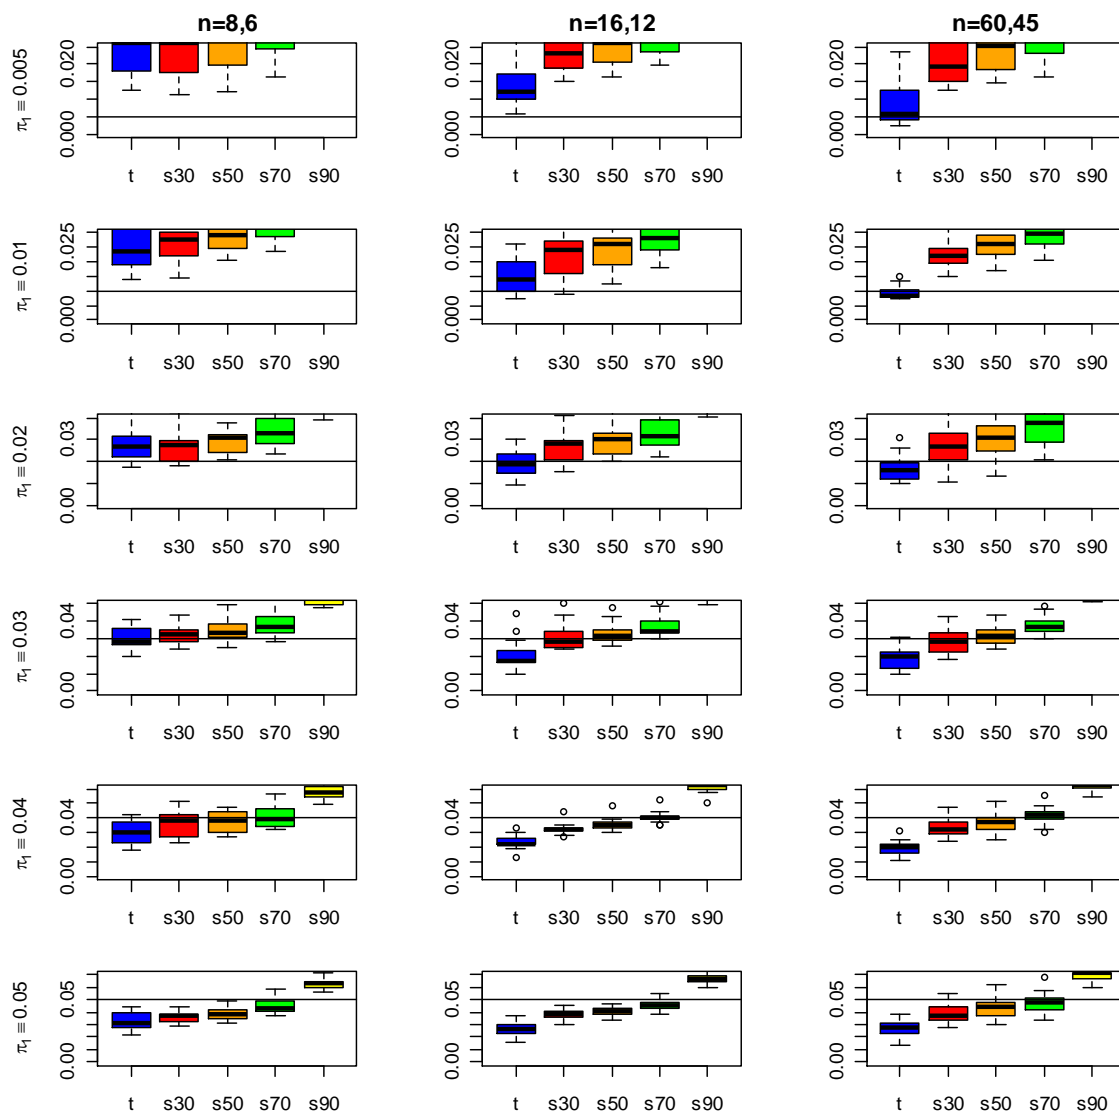

**Figure 14.** ‘fdrtool’ estimates of  $\pi_1$  for the t-statistic and four s-statistics in a type EV simulation with the SD rescaling factor and z-statistic input specification. A reference line is drawn at  $\pi_1$ , the true proportion of differentially expressed genes.



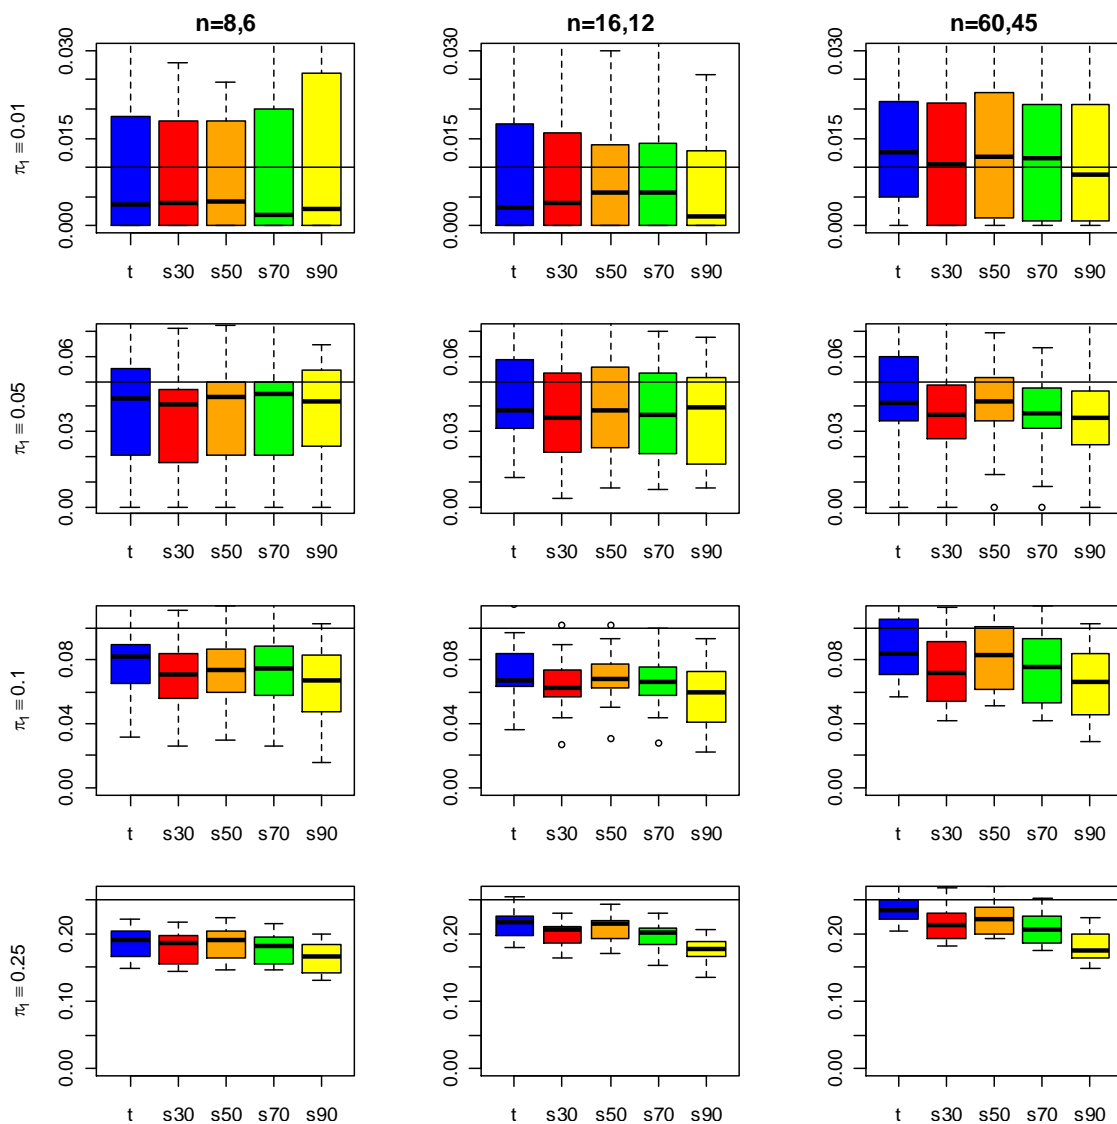

**Figure 15.** 'qvalue' estimates of  $\pi_1$  for the t-statistic and four s-statistics in a type EV simulation. A reference line is drawn at  $\pi_1$ , the true proportion of differentially expressed genes.

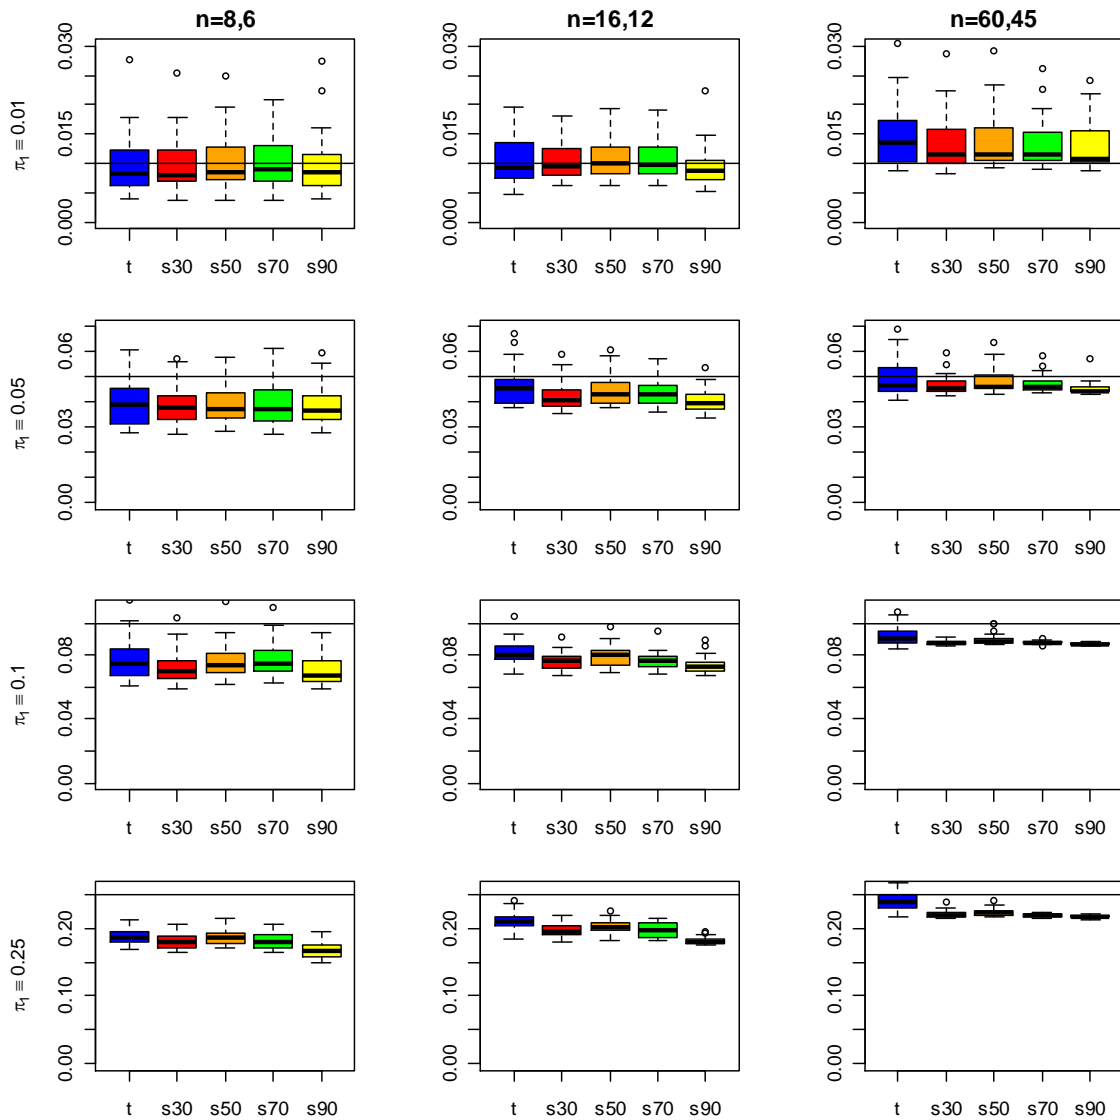

**Figure 16.** 'convest' estimates of  $\pi_1$  for the t-statistic and four s-statistics in a type EV simulation. A reference line is drawn at  $\pi_1$ , the true proportion of differentially expressed genes.

## APPENDIX B: RESULTS FOR UV1 SIMULATIONS

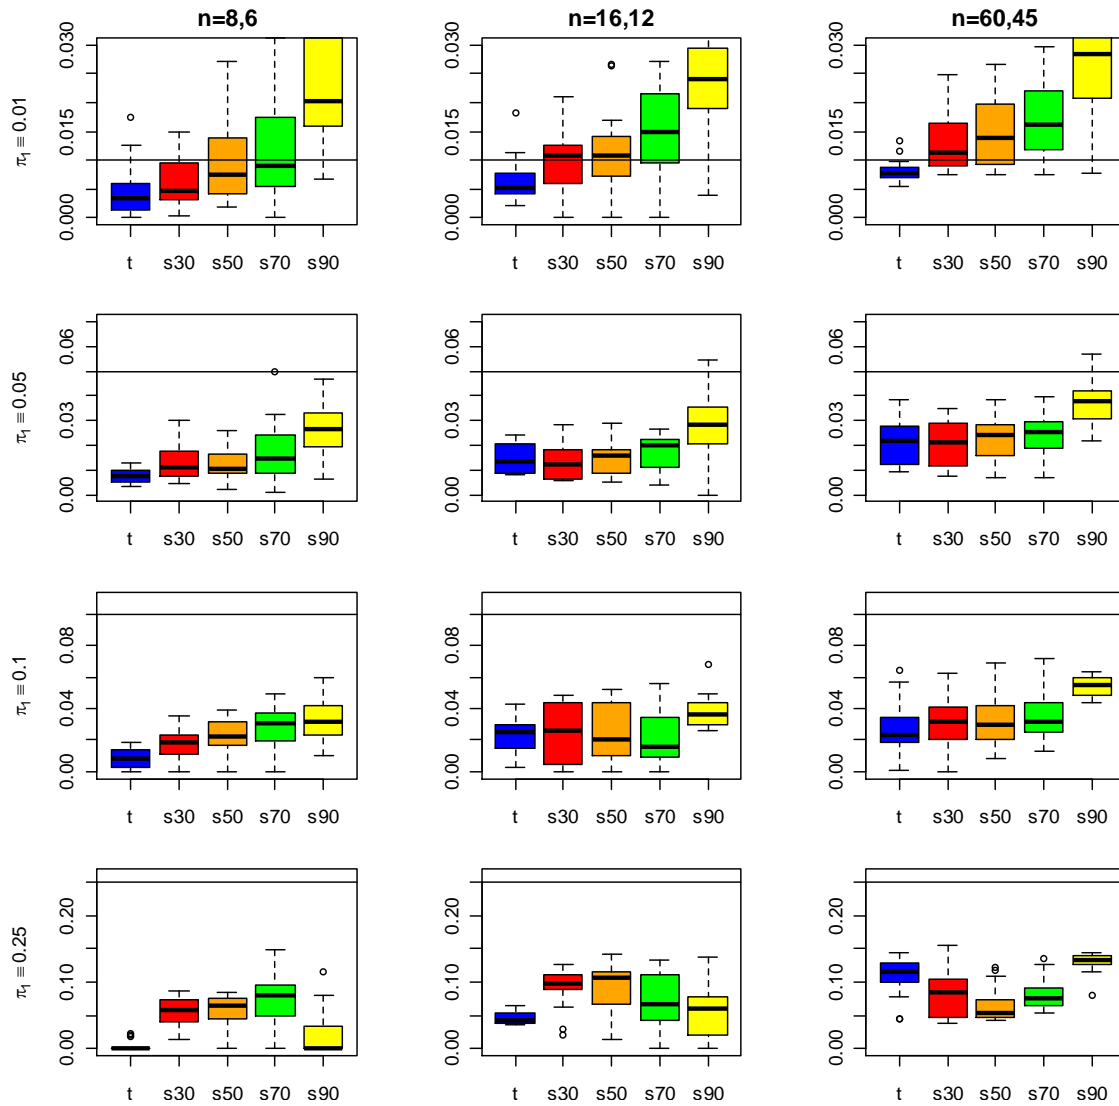

**Figure 17.** 'fdrtool' estimates of  $\pi_1$  for the t-statistic and four s-statistics in a type UV1 simulation with the IQR rescaling factor and t-statistic input specification. A reference line is drawn at  $\pi_1$ , the true proportion of differentially expressed genes.

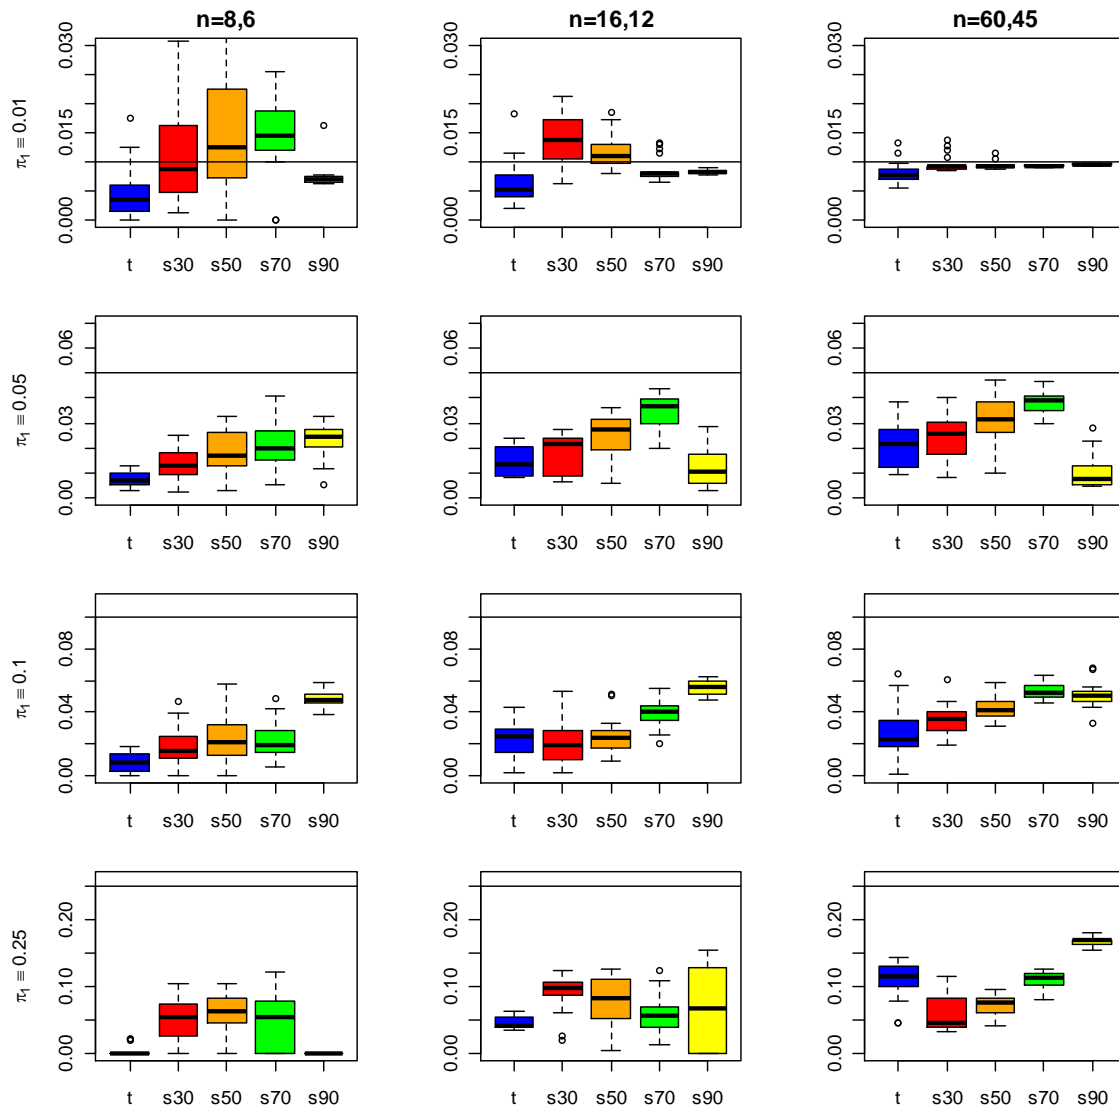

**Figure 18.** 'fdrtool' estimates of  $\pi_1$  for the t-statistic and four s-statistics in a type UV1 simulation with the SD rescaling factor and t-statistic input specification. A reference line is drawn at  $\pi_1$ , the true proportion of differentially expressed genes.

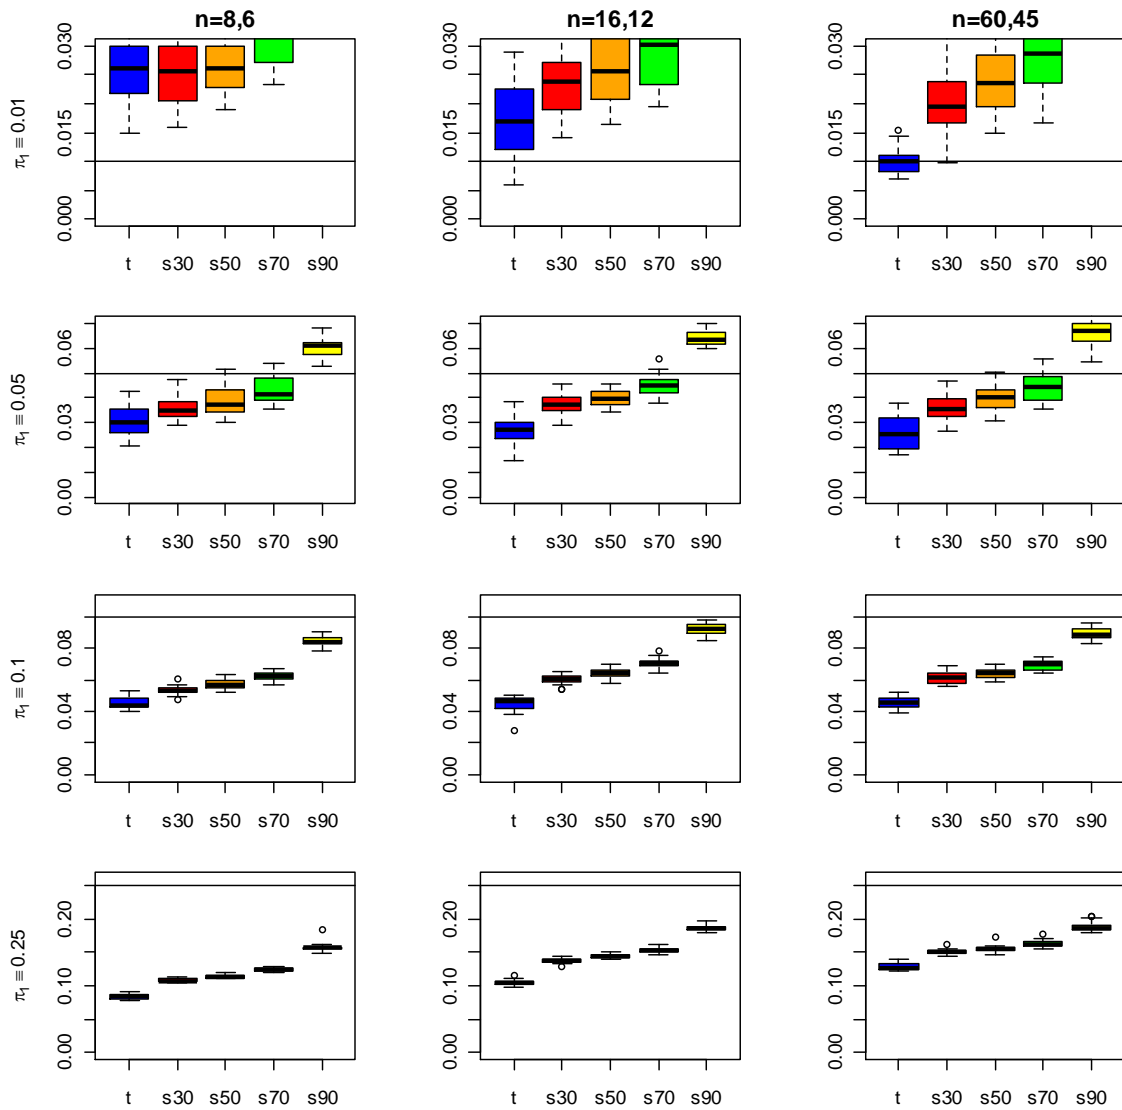

**Figure 19.** 'fdrtool' estimates of  $\pi_1$  for the t-statistic and four s-statistics in a type UV1 simulation with the IQR rescaling factor and z-statistic input specification. A reference line is drawn at  $\pi_1$ , the true proportion of differentially expressed genes.

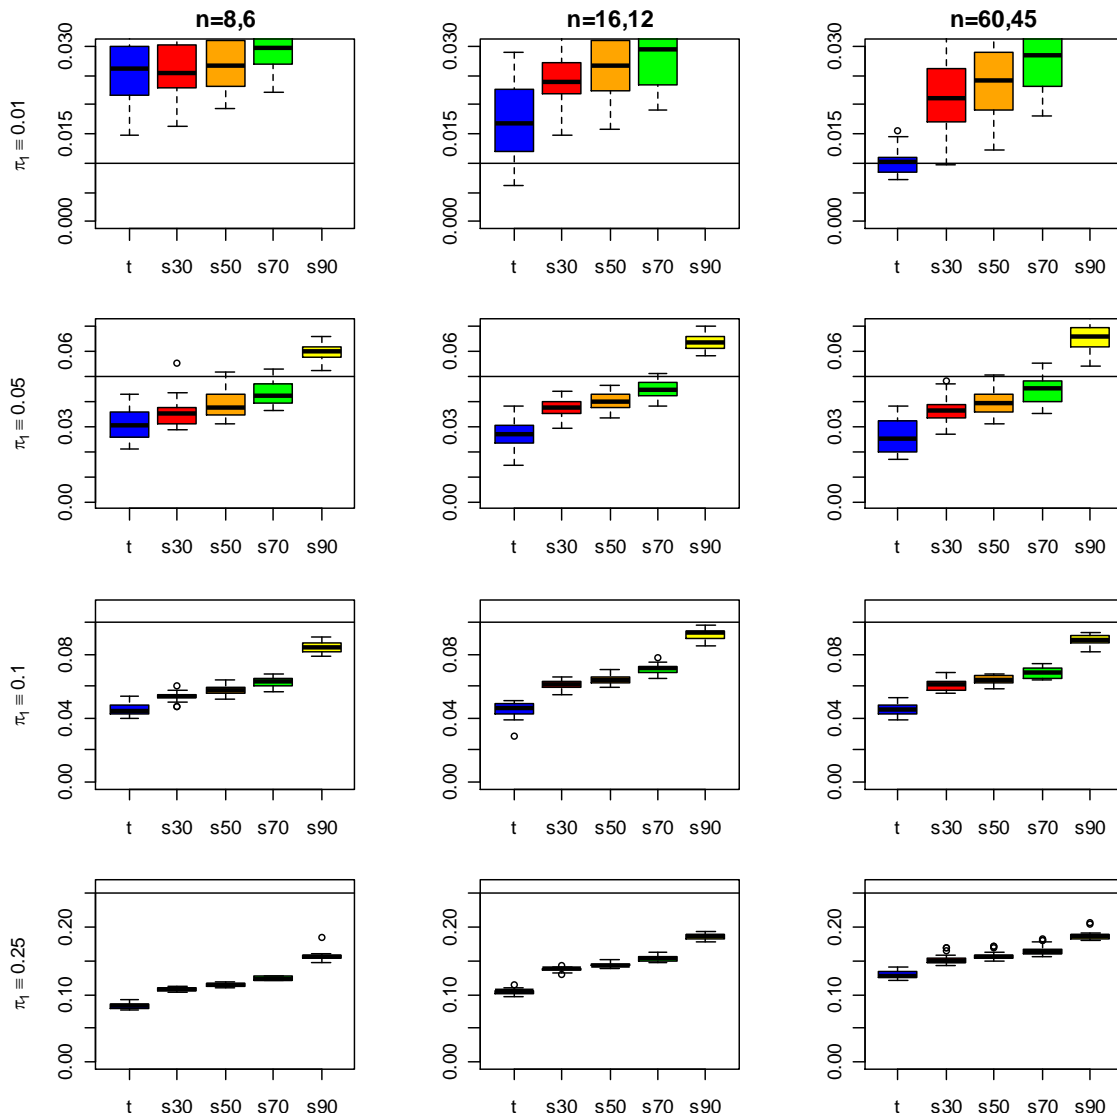

**Figure 20.** 'fdrtool' estimates of  $\pi_1$  for the t-statistic and four s-statistics in a type UV1 simulation with the SD rescaling factor and z-statistic input specification. A reference line is drawn at  $\pi_1$ , the true proportion of differentially expressed genes.

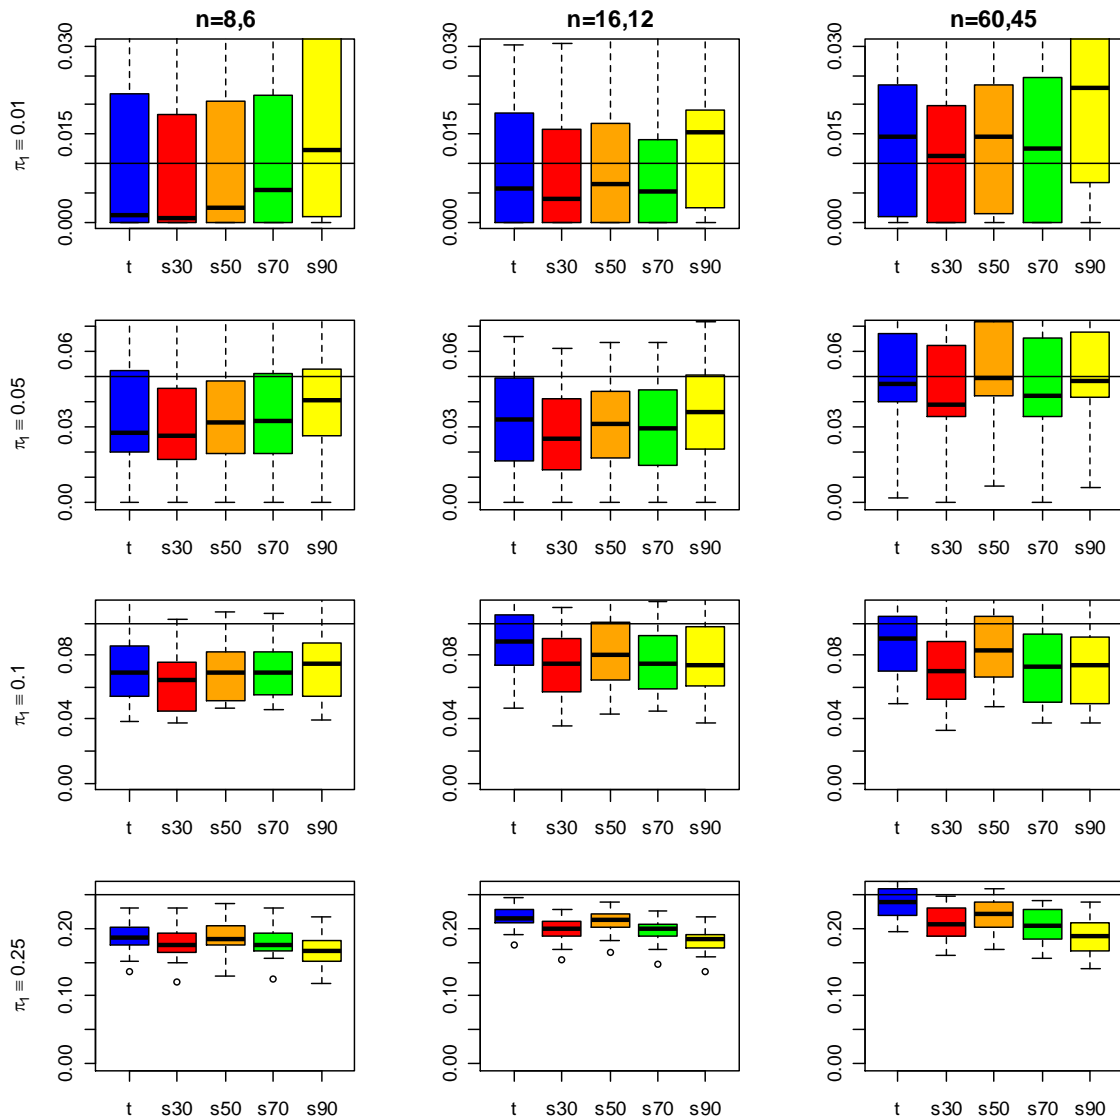

**Figure 21.** 'qvalue' estimates of  $\pi_1$  for the t-statistic and four s-statistics in a type UV1 simulation. A reference line is drawn at  $\pi_1$ , the true proportion of differentially expressed genes.

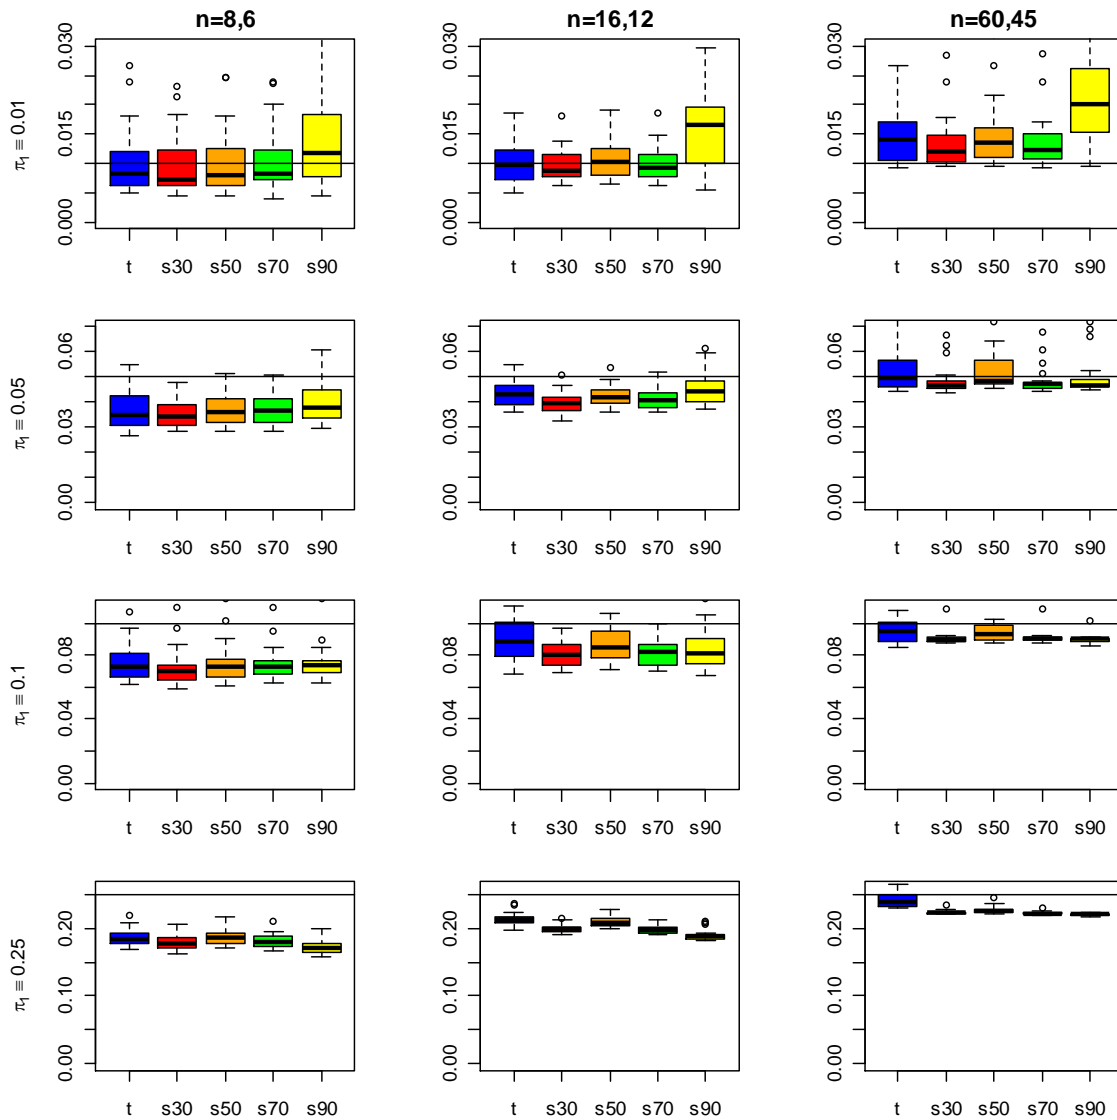

**Figure 22.** 'convest' estimates of  $\pi_1$  for the t-statistic and four s-statistics in a type UV1 simulation. A reference line is drawn at  $\pi_1$ , the true proportion of differentially expressed genes.



## APPENDIX C: RESULTS FOR UV2 SIMULATIONS

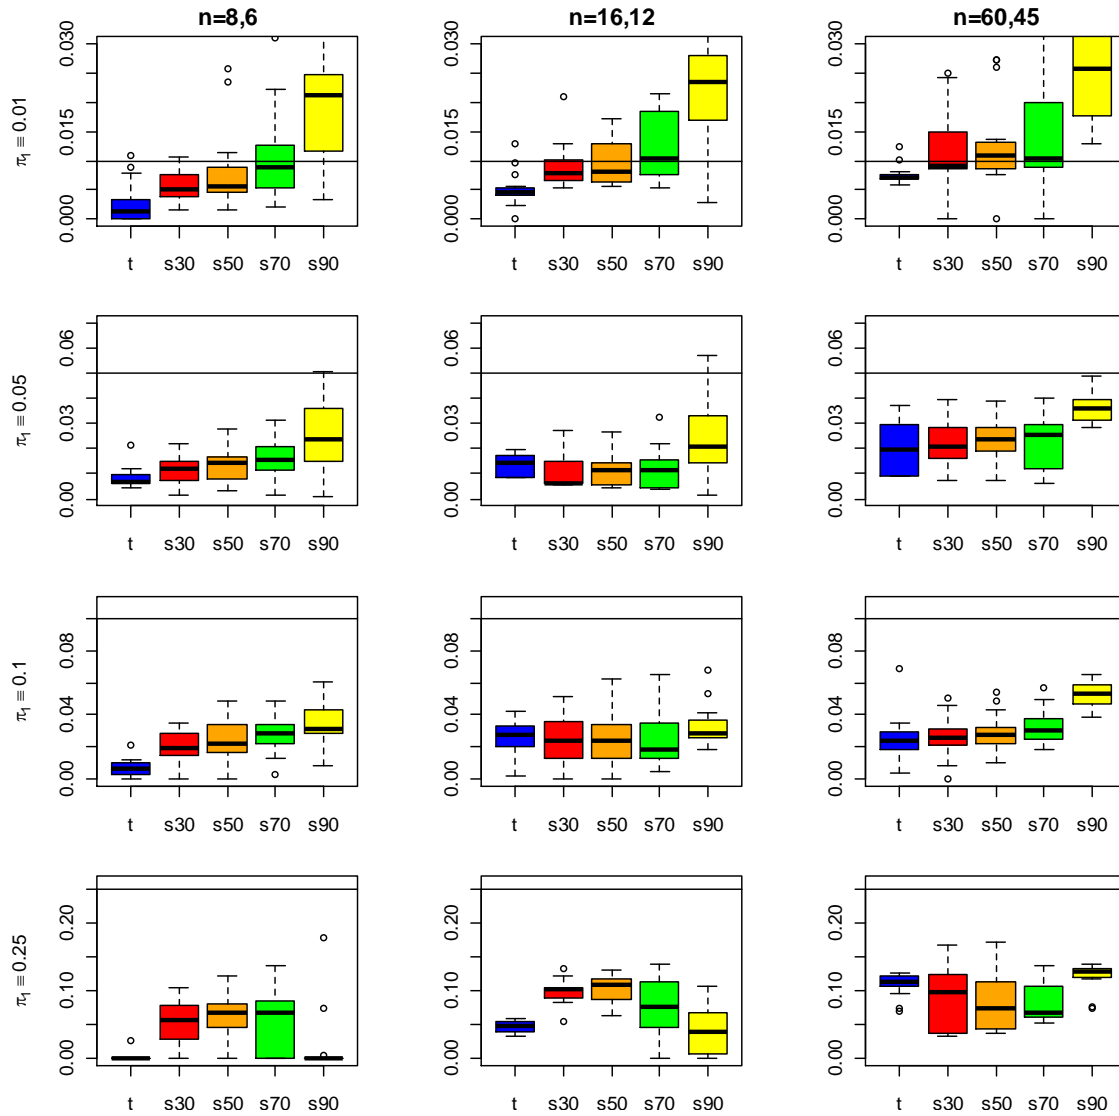

**Figure 23.** 'fdrtool' estimates of  $\pi_1$  for the t-statistic and four s-statistics in a type UV2 simulation with the IQR rescaling factor and t-statistic input specification. A reference line is drawn at  $\pi_1$ , the true proportion of differentially expressed genes.

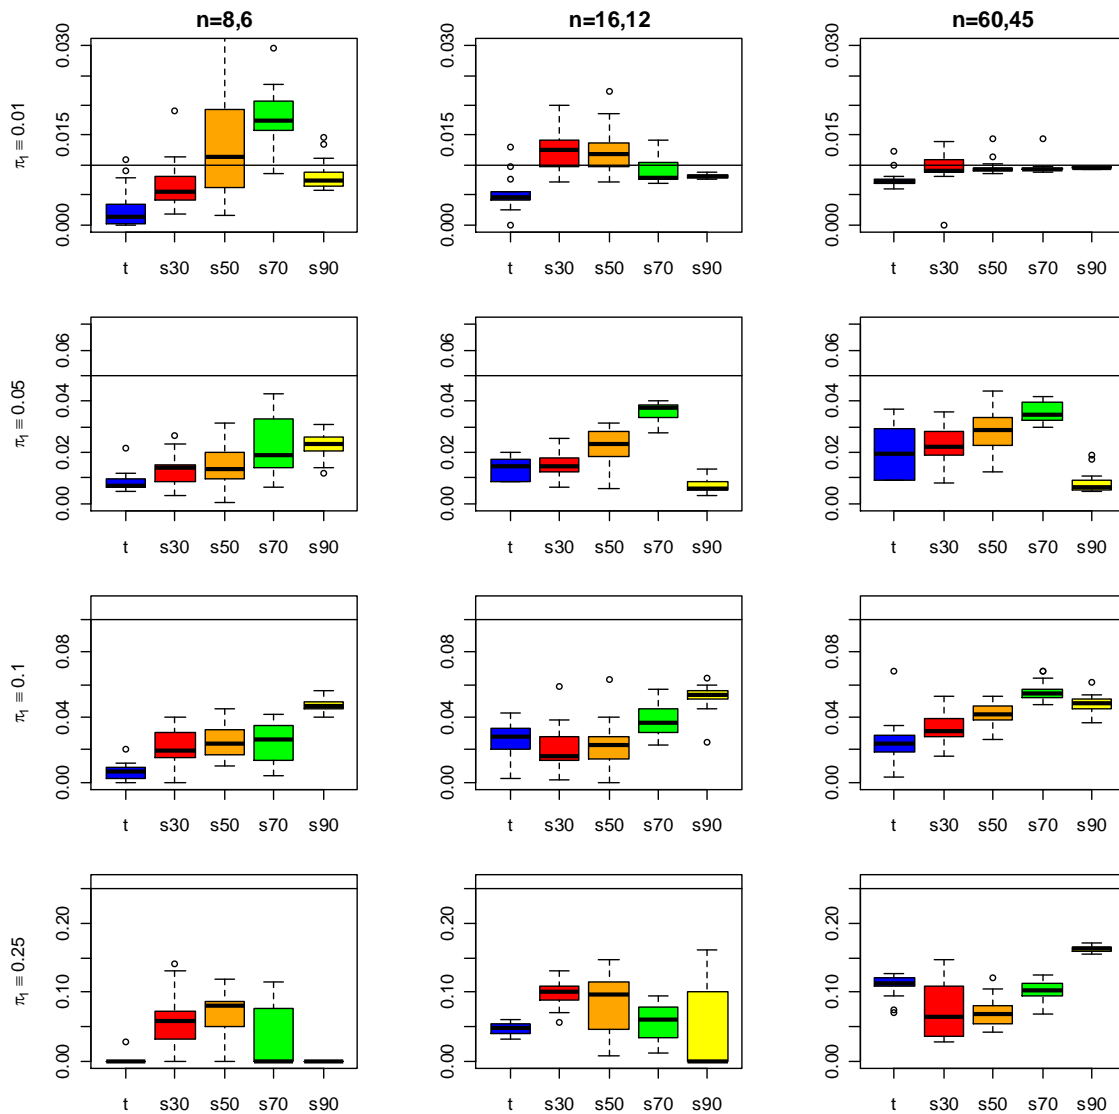

**Figure 24.** 'fdrtool' estimates of  $\pi_1$  for the t-statistic and four s-statistics in a type UV2 simulation with the SD rescaling factor and t-statistic input specification. A reference line is drawn at  $\pi_1$ , the true proportion of differentially expressed genes.

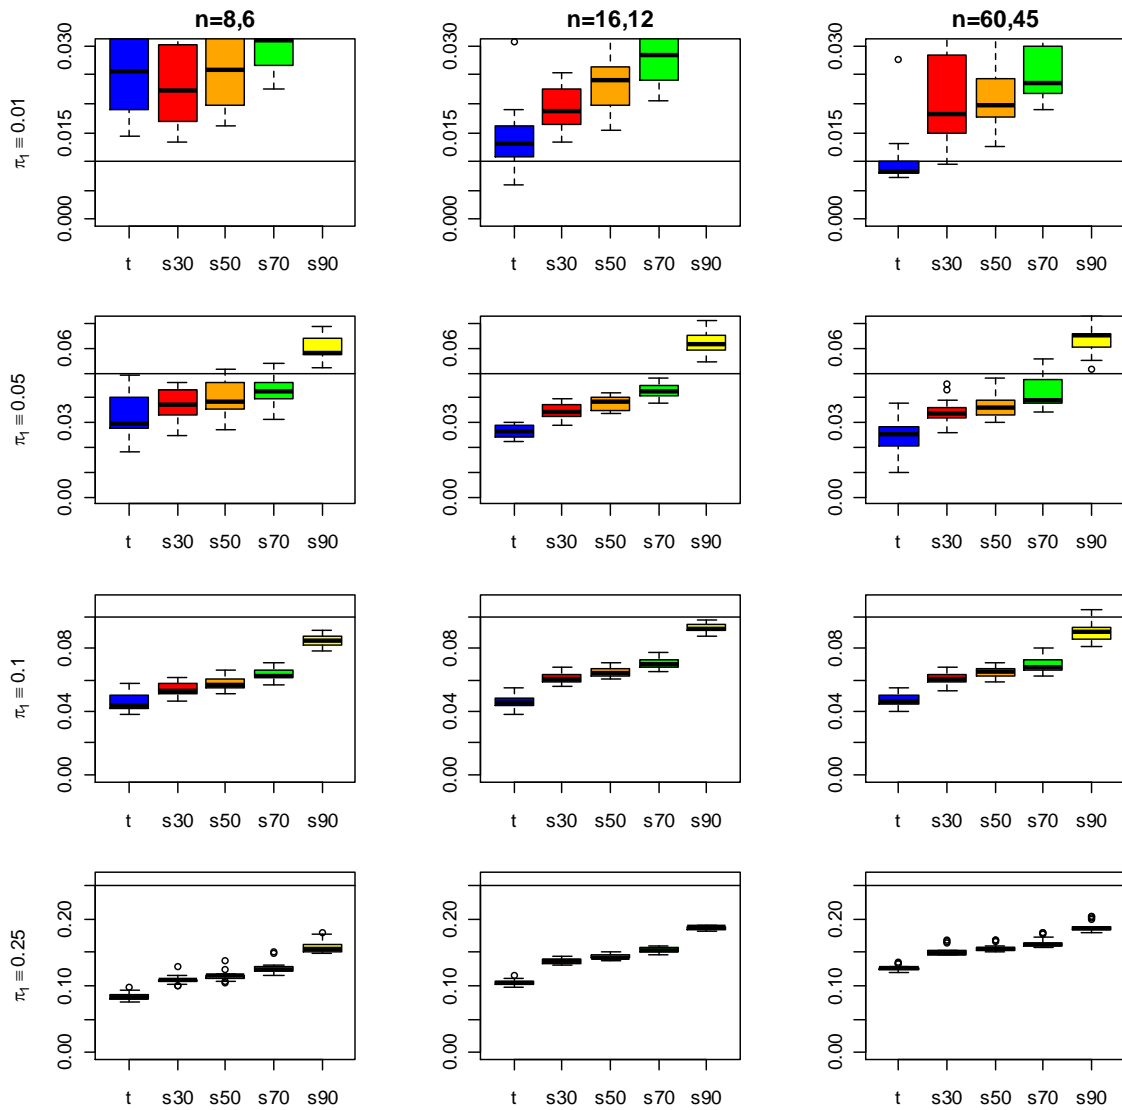

**Figure 25.** 'fdrtool' estimates of  $\pi_1$  for the t-statistic and four s-statistics in a type UV2 simulation with the IQR rescaling factor and z-statistic input specification. A reference line is drawn at  $\pi_1$ , the true proportion of differentially expressed genes.

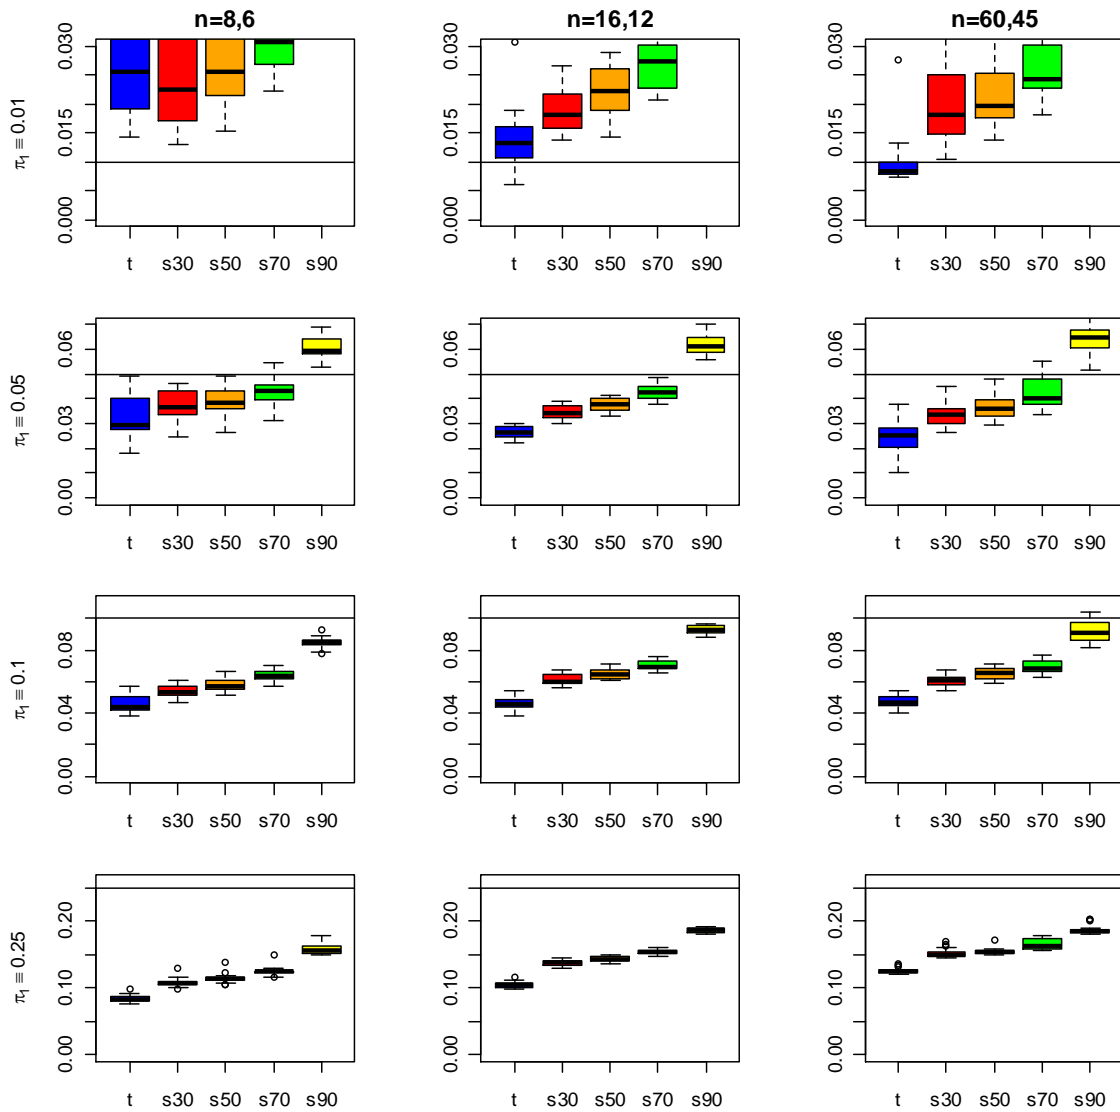

**Figure 26.** 'fdrtool' estimates of  $\pi_1$  for the t-statistic and four s-statistics in a type UV2 simulation with the SD rescaling factor and z-statistic input specification. A reference line is drawn at  $\pi_1$ , the true proportion of differentially expressed genes.

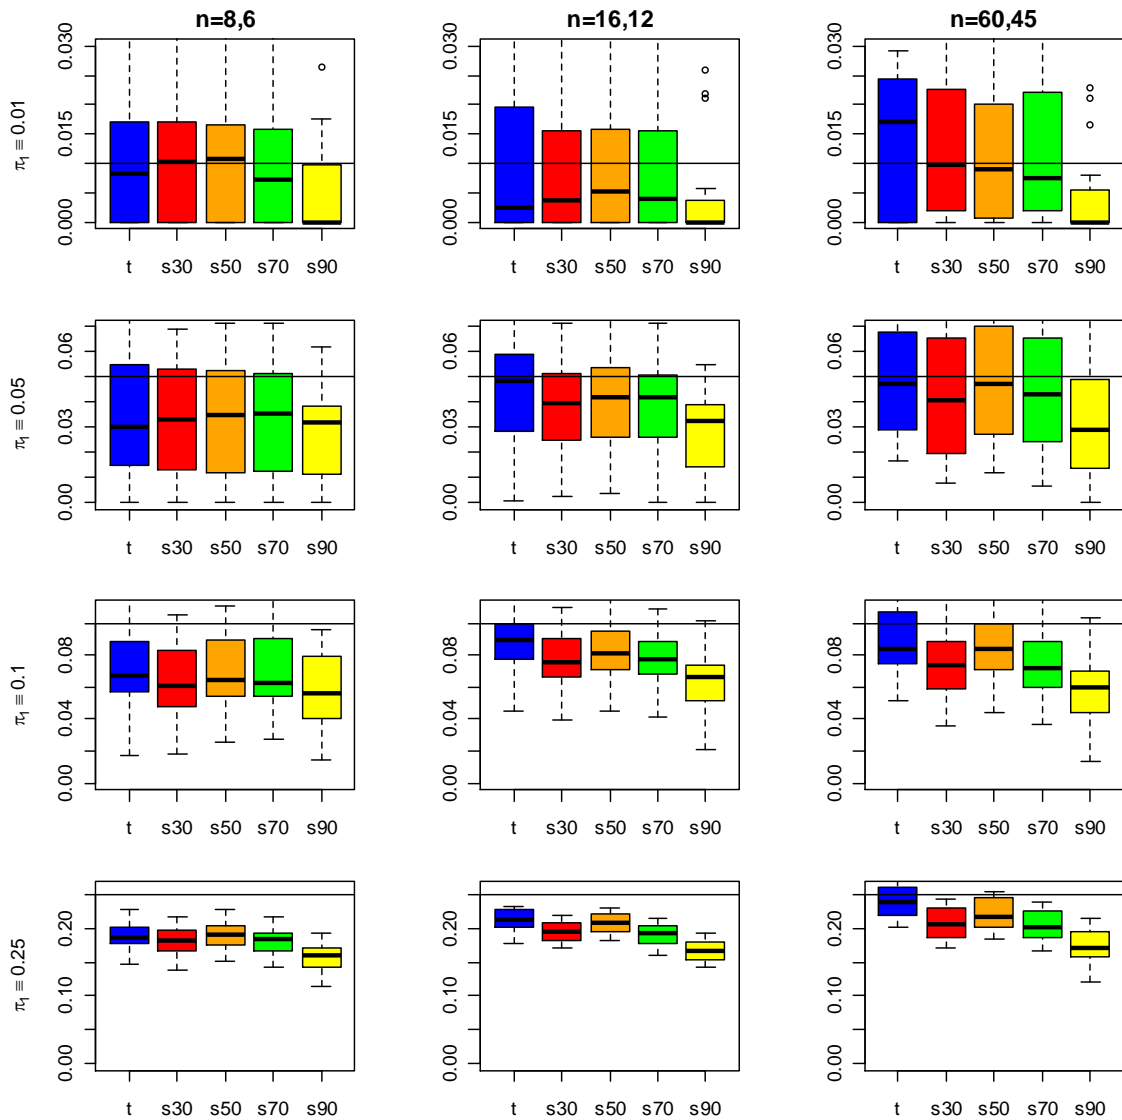

**Figure 27.** 'qvalue' estimates of  $\pi_1$  for the t-statistic and four s-statistics in a type UV2 simulation. A reference line is drawn at  $\pi_1$ , the true proportion of differentially expressed genes.

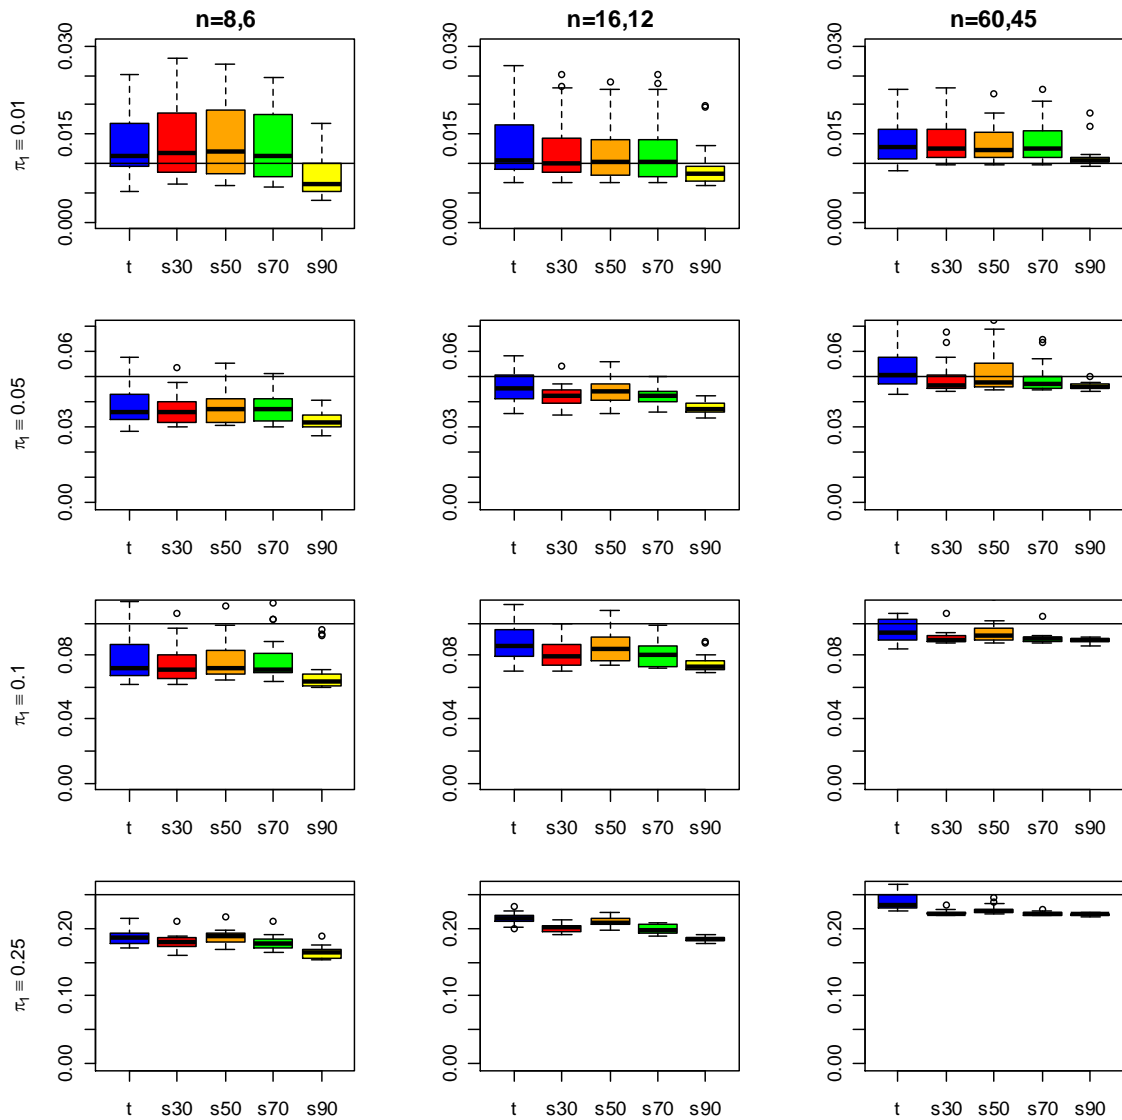

**Figure 28.** 'convest' estimates of  $\pi_1$  for the t-statistic and four s-statistics in a type UV2 simulation. A reference line is drawn at  $\pi_1$ , the true proportion of differentially expressed genes.
